# Supplementary material for: Protopanaxadiol-Enriched Rice Extracts Suppressed Oxidative and Melanogenic Activities in Melan-a Cells
Source: MDPI journal article supplement (doi:10.3390/antiox12010166), 2023-01-10

## Supplementary Materials

**Figure S1.** The calibration curve of PPD over the concentration range of 0.0156–0.50000 ppm.

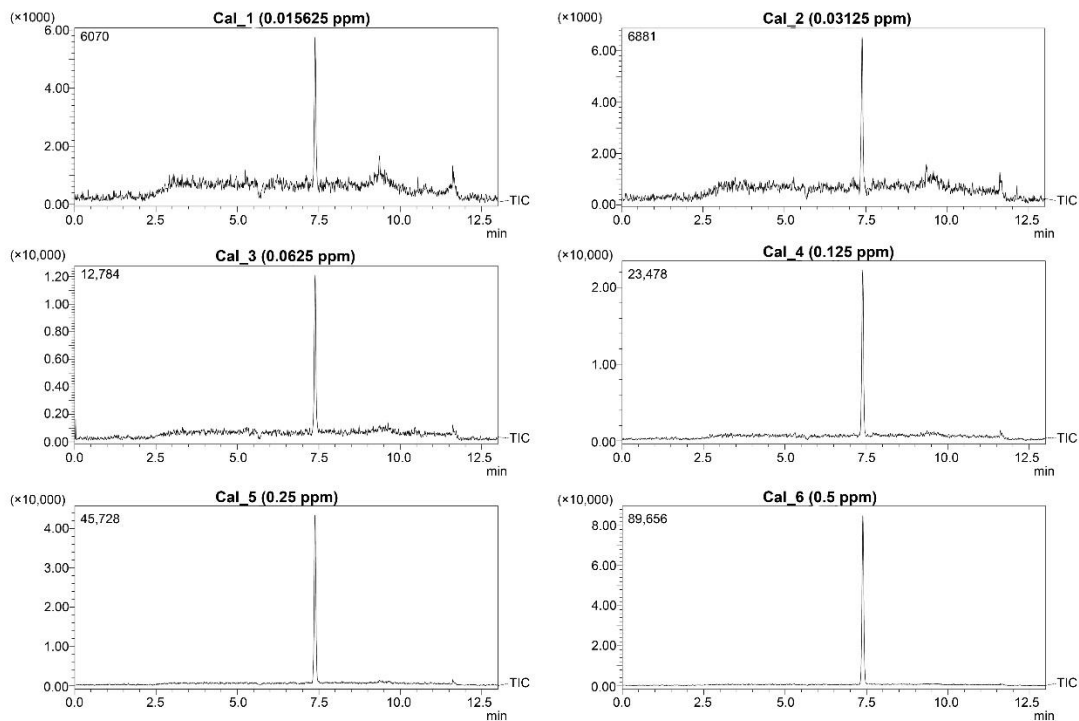

### Calibration curve

ID# : 1 m/z : 425.0000>407.2000  
 Name : PPD  
 Quantitative method : External standard  
 Function :  $f(x) = 202,985x + 2592.25$   
 Rr1 = 0.9992163 Rr2 = 0.9984331  
 MeanRF:  $2.644939 \times 10^5$  RF SD:  $9.865022 \times 10^4$  RF %RSD: 37.297735  
 FitType : Linear  
 ZeroThrough : Not through  
 Weighted regression : None

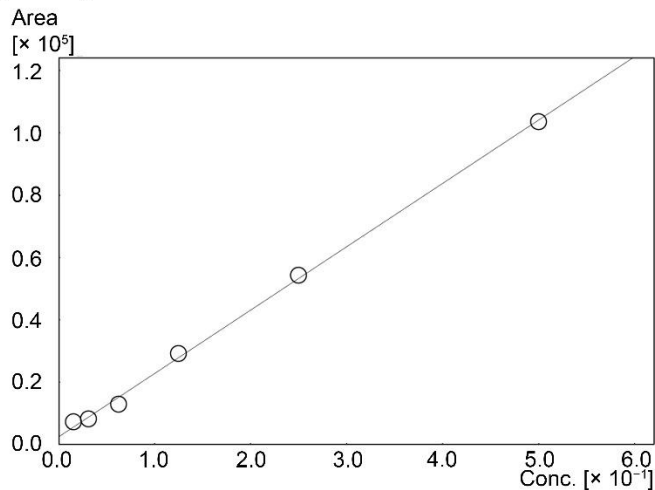

| # | Conc. (Ratio) | MeanArea | Area    |
|---|---------------|----------|---------|
| 1 | 0.015625      | 7210     | 7210    |
| 2 | 0.03125       | 8164     | 8164    |
| 3 | 0.0625        | 12,890   | 12,890  |
| 4 | 0.125         | 29,202   | 29,202  |
| 5 | 0.25          | 54,308   | 54,308  |
| 6 | 0.5           | 103,592  | 103,592 |

**Figure S2.** PPD production in the transgenic rice seed extracts. (a) Representation of the MS chromatograms of PPD detected in transgenic rice seed extracts (the Y axis of sample #8 is  $\times 100,000$ , whereas the Y axes of the other samples are  $\times 10,000$ ). (b) The amount of PPD in each transgenic rice line. Data are presented as means  $\pm$  standard deviations. Lowercase letters (a, b, c, and d) indicate significant differences at  $p < 0.05$  among the treatments.

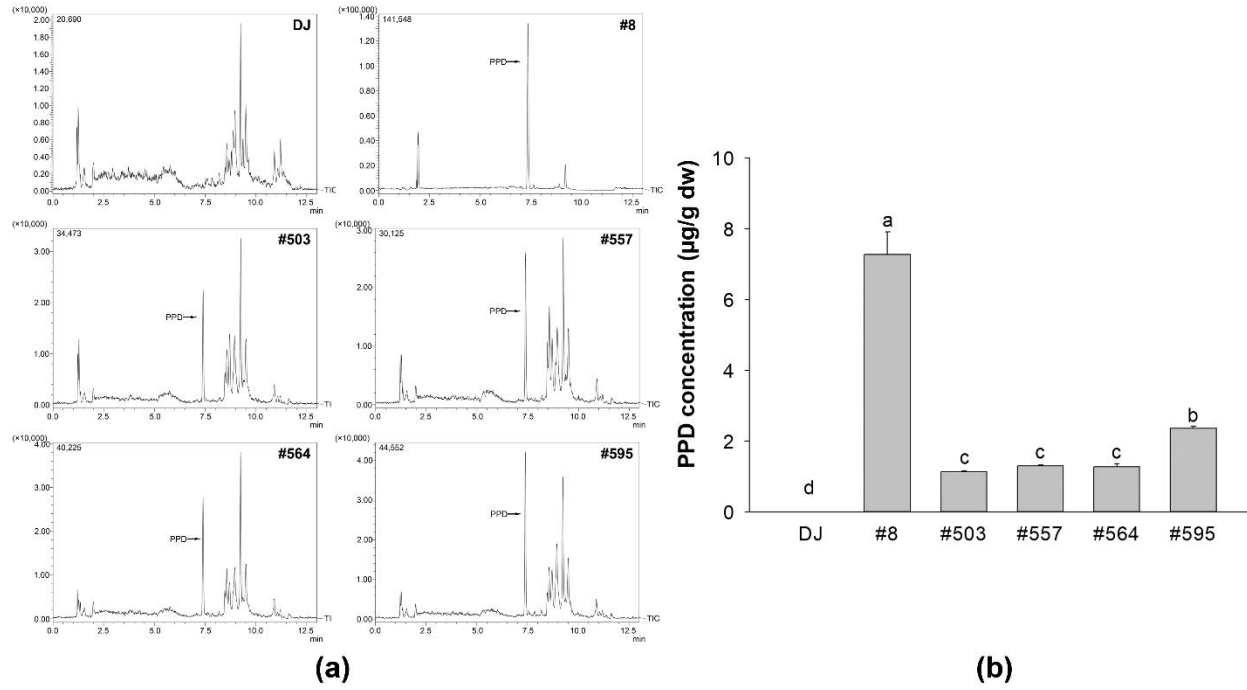

Supplement: s1 [file s1]
